# Supplementary material
Source: MDPI journal article supplement (https://www.mdpi.com/1424-2818/14/11/1002)
Supplement: s1 [file s1]

**Supplementary Table S1. List of all species in four types of communities.**

| <b>Gramineae grass-Kobresia humilis community (GK)</b> | <b>K.humilis community (KH)</b>              | <b>K.pygmaea community (KP)</b>     | <b>Forbs- Black soil (FB)</b>      |
|--------------------------------------------------------|----------------------------------------------|-------------------------------------|------------------------------------|
| <i>Koeleria cristata</i>                               | <i>Potentilla bifurca</i>                    | <i>Kobresia humilis</i>             | <i>Elsholtzia densa</i> Benth      |
| <i>Festuca ovina</i>                                   | <i>Potentilla multifida</i>                  | <i>Kobresia pygmaea</i>             | <i>Ajania tenuifolia</i>           |
| <i>Poa koelzii</i>                                     | <i>Ajania tenuifolia</i>                     | <i>Leontopodium leontopodioides</i> | <i>Potentilla anserina</i>         |
| <i>Kobresia humilis</i>                                | <i>Artemisia scoparia</i>                    | <i>Potentilla multifida</i>         | <i>Potentilla bifurca</i>          |
| <i>K. pygmaea</i>                                      | <i>Oxytropis alpina</i>                      | <i>Lagotis brachystachya</i>        | <i>Microula sikkimensis</i>        |
| <i>Pedicularis kansuensis</i>                          | <i>Kobresia humilis</i>                      | <i>Taraxacum mongolicum</i>         | <i>Lamiophlomis rotat</i>          |
| <i>Oxytropis kansuensis</i>                            | <i>Poa koelzii</i>                           | <i>Poa koelzii</i>                  | <i>Artemisia scoparia</i>          |
| <i>Artemisia moorcroftiana</i>                         | <i>Gentiana farreri</i>                      | <i>Potentilla bifurca</i>           | <i>Polygonum sibiricum</i>         |
| <i>Calystegia hederacea</i>                            | <i>Stipa purpurea</i>                        | <i>Oxytropis qinghaiensis</i>       | <i>Cirsium souliei</i>             |
| <i>Leontopodium leontopodioides</i>                    | <i>Carex composita</i>                       | <i>Gentiana dahurica</i>            | <i>Anemone cathayensis</i>         |
| <i>Parnassia trinervis</i>                             | <i>Oxytropis kansuensis</i>                  | <i>Potentilla saundersiana</i>      | <i>Agropyron cristatum</i>         |
| <i>Swertia tetraptera</i>                              | <i>Bupleurum smithii</i>                     | <i>Microula sikkimensis</i>         | <i>Veronica didyma</i>             |
| <i>Lamiophlomis rotata</i>                             | <i>Artemisia moorcroftiana</i>               | <i>Thalictrum alpinum</i>           | <i>Ajania tenuifolia</i>           |
| <i>Ajania tenuifolia</i>                               | <i>Ajania tenuifolia</i>                     | <i>Carex breviculmis</i>            | <i>Ligularia sibirica</i>          |
| <i>Astragalus przewalskii</i>                          | <i>Elsholtzia densa</i>                      | <i>Saussurea pulchra</i>            | <i>Ranunculus japonicus</i>        |
| <i>Ranunculus pulchellus</i>                           | <i>Poa annua</i>                             | <i>Saussureajaponica</i>            | <i>Poa annua</i>                   |
| <i>Gueldenstaedtia verna</i>                           | <i>Stipa aliena</i>                          | <i>Gueldenstaedtia verna</i>        | <i>Kobresia capillifolia</i>       |
| <i>Lancea tibetica</i>                                 | <i>Festuca rubra</i>                         | <i>Oxytropis kansuensis</i>         | <i>Glaux maritima</i>              |
| <i>Ranunculus longicaulis</i>                          | <i>Elymus nutans</i>                         | <i>Ranunculus longicaulis</i>       | <i>Taraxacum mongolicum</i>        |
| <i>Veronica biloba</i>                                 | <i>Saussurea superba</i>                     | <i>Herba Lanceate Tibiticae</i>     | <i>Calystegia hederacea</i>        |
| <i>Oxytropis alpina</i>                                | <i>Gentiana straminea</i>                    | <i>Cyperaceae</i>                   | <i>Clematis florida</i>            |
| <i>Pedicularis verticillata</i>                        | <i>Morina chinensis</i>                      | <i>Gentiana siphonantha</i>         | <i>Lepidium apetalum</i>           |
| <i>Swertia bimaculata</i>                              | <i>Saussurea nigrescens</i>                  | <i>Anaphalis lactea</i>             | <i>Ajuga lupulina</i>              |
| <i>Veronica ciliata</i>                                | <i>Melilotoides archiducis-nicalai</i>       | <i>Astragalus przewalskii</i> Bunge | <i>Pomatosace filicula</i>         |
| <i>Potentilla anserina</i>                             | <i>Tibetia himalaica</i>                     | <i>Lonicera japonica</i>            | <i>Saxifraga stolonifera</i>       |
| <i>Thalictrum alpinum</i>                              | <i>Ranunculus tanguticus</i>                 | <i>Stipa purpurea</i>               | <i>Euphorbia pekinensis</i>        |
| <i>Elymus nutans</i>                                   | <i>Potentilla saundersiana</i>               | <i>Koeleria Pers</i>                | <i>Festuca ovina</i>               |
| <i>Festuca ovina</i>                                   | <i>Hilicotricon tibeticum</i>                | <i>Aster asteroides</i>             | <i>Chenopodium album</i>           |
| <i>Aster flaccidus</i>                                 | <i>Thalistrum alpinrm</i> var. <i>elatum</i> | <i>Potentilla nivea</i>             | <i>Koeleria cristata</i>           |
| <i>Polygonum sibiricum</i>                             | <i>Euphorbia fischeriana</i>                 | <i>Swertia bimaculata</i>           | <i>Galium aparine</i>              |
| <i>Gentiana farreri</i>                                | <i>Euphorbia kansuensis</i>                  | <i>Hedyotis trinervia</i>           | <i>Ajania khartensis</i>           |
| <i>Polygonum viviparum</i>                             | <i>Cirsium setosum</i>                       | <i>Pedicularis kansuensis</i>       | <i>Pleurospermum camtschaticum</i> |
| <i>Carex composita</i>                                 | <i>Potentilla chinensis</i>                  | <i>Iris tectorum</i>                | <i>Galium verum</i>                |
| <i>Gentianopsis paludosa</i>                           | <i>Thalictrum aquilegifolium</i>             | <i>Anaphalis sinica</i>             | <i>Thermopsis lanceolata</i>       |
| <i>Poa annua</i>                                       | <i>Taraxacum mongolicum</i>                  | <i>Oxytropis myriophylla</i>        | <i>Primula florindae</i>           |
| <i>Carex moorcroftii</i>                               |                                              | <i>Gentiana straminea</i>           | <i>Thalictrum alpinum</i>          |
| <i>Ajania tenuifolia</i>                               |                                              | <i>Gentiana squarrosa</i>           | <i>Elymus nutans</i>               |
| <i>Pedicularis oederi</i>                              |                                              | <i>Astragalus membranaceus</i>      | <i>Potentilla multifida</i>        |
| <i>Oxytropis imbricata</i>                             |                                              | <i>Poa annua</i>                    | <i>Lonicera japonica</i>           |
| <i>Veronica didyma</i>                                 |                                              |                                     | <i>Chenopodium glaucum</i>         |
| <i>Delphinium grandiflorum</i>                         |                                              |                                     | <i>Swertia bimaculata</i>          |
